# Supplementary material for: Eating Jet Lag: A Marker of the Variability in Meal Timing and Its Association with Body Mass Index
Source: Nutrients. 2019 Dec 6;11(12):2980. doi: 10.3390/nu11122980 (PMC6950551; doi:10.3390/nu11122980)
Supplement: Supplementary file 1 [file nutrients-11-02980-s001.pdf]

**Table S1.** General characteristics of the studied population.

| Variable                           | Mean (SD)     |
|------------------------------------|---------------|
| Sample size, n                     | 1 106         |
| % Spanish                          | 72.1          |
| % Females                          | 78.4          |
| Age, years                         | 21.0 (2.5)    |
| <b>BMI, kg/m<sup>2</sup></b>       | 22.2 (3.4)    |
| Underweight, %                     | 8.0           |
| Normal-weight, %                   | 75.5          |
| Overweight, %                      | 12.9          |
| Obese, %                           | 3.5           |
| <b>Diet quality</b>                |               |
| Low, %                             | 7.6           |
| Average, %                         | 58.0          |
| High, %                            | 34.4          |
| <b>Physical Activity</b>           |               |
| Low, %                             | 22.2          |
| Moderate, %                        | 27.0          |
| Vigorous, %                        | 50.7          |
| <b>Circadian related variables</b> |               |
| Sleep duration, h                  | 8.1 (1.0)     |
| Chronotype (MSF), hh:mm            | 05:17 (01:13) |
| Social jet lag, h                  | 1.7 (1.0)     |
| Eating duration, h                 | 11.3 (2.5)    |

Data are expressed as mean (SD) or proportions. Abbreviations: BMI, body mass index; hh:mm, hours: minutes; MSF, midpoint of sleep on free-days.
